# Supplementary material
Source: MDPI journal article supplement (https://www.mdpi.com/2073-4395/12/10/2359)

## Training accuracy / loss

### BRACOL Dataset

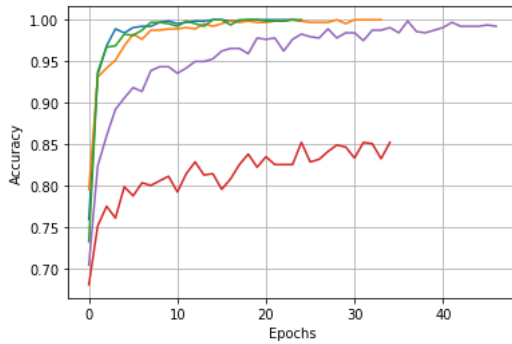

### Rocole dataset

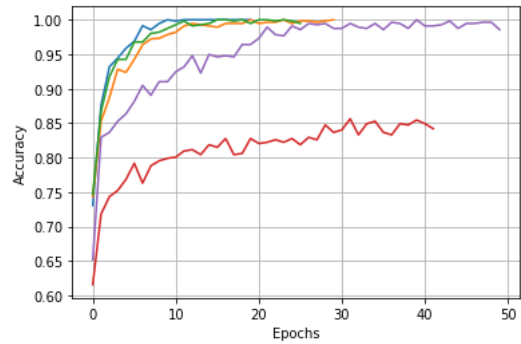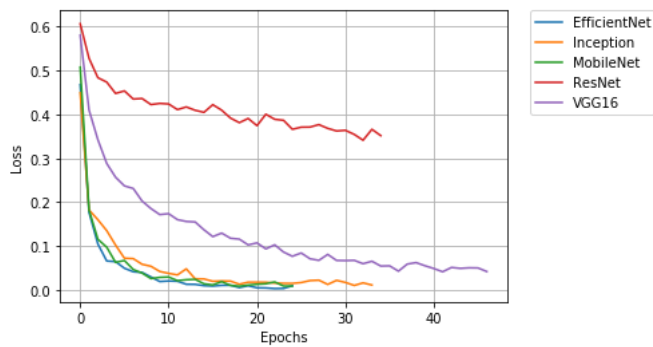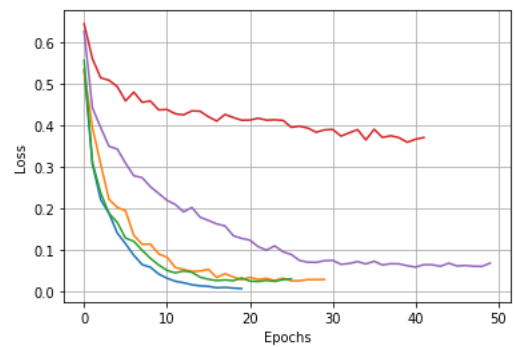

### Plant Pathology dataset

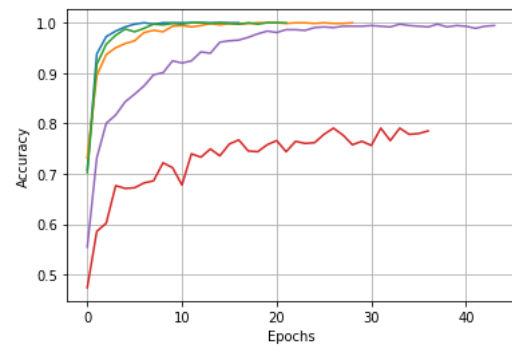

### Plant Village dataset

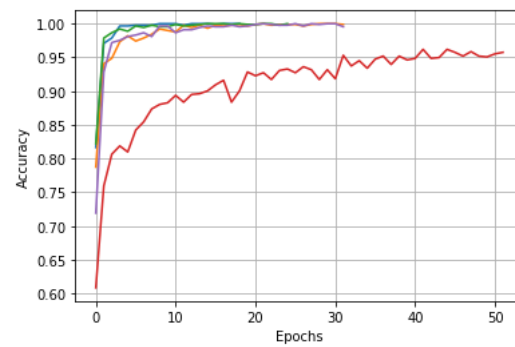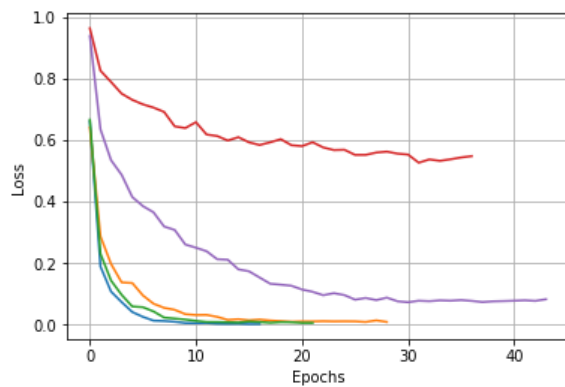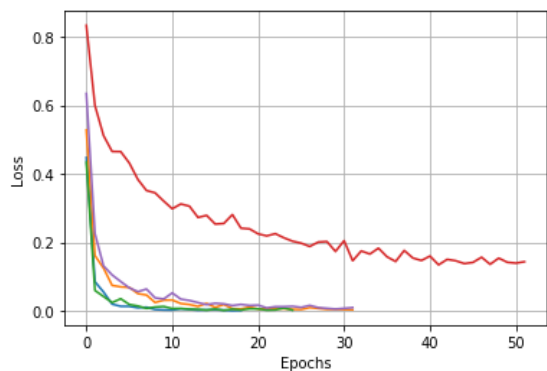

Supplement: s1 [file s1 › agronomy-1852544-supplementary.pdf]
